# Supplementary material
Source: HighWire-hosted journal article supplement (http://www.jrheum.org/highwire/filestream/36091/field_highwire_adjunct_files/0/181284DataSuppl.pdf)
Supplement: 181284DataSuppl.pdf [file 181284DataSuppl.pdf]

**Supplementary Figure 1.**

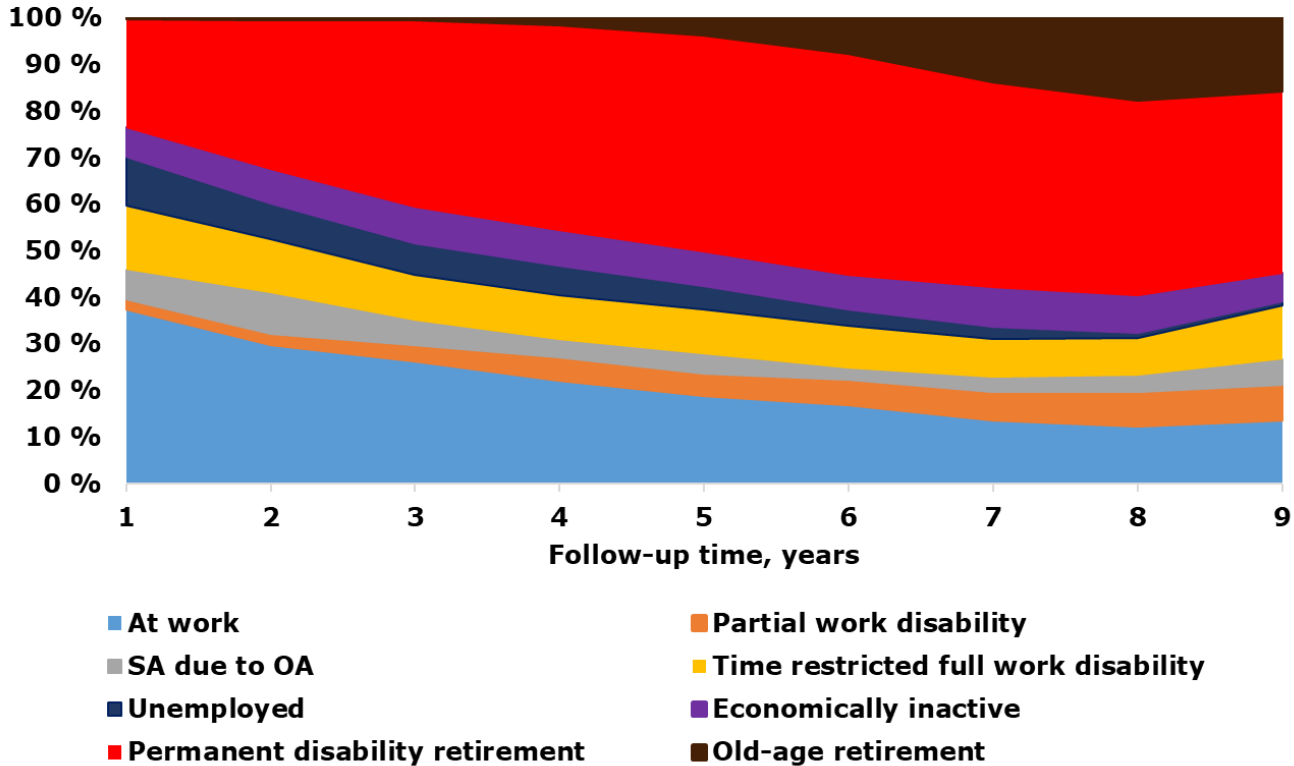

|               | 1 <sup>st</sup> year | 5 <sup>th</sup> year | 9 <sup>th</sup> year |
|---------------|----------------------|----------------------|----------------------|
| at work       | 37.6 (33.8 to 41.5)  | 19.0 (14.5 to 23.6)  | 13.9 (7.4 to 20.5)   |
| pWD           | 2.1 (1.0 to 3.2)     | 4.7 (3.0 to 6.4)     | 7.4 (4.8 to 10.0)    |
| SA due to OA  | 6.3 (5.2 to 7.5)     | 4.0 (3.1 to 4.8)     | 5.4 (4.1 to 6.6)     |
| TrFWD         | 13.7 (12.5 to 14.9)  | 9.7 (8.5 to 10.9)    | 11.6 (9.9 to 13.4)   |
| UE            | 10.7 (8.5 to 12.9)   | 5.2 (3.5 to 6.9)     | 1.0 (0.1 to 1.9)     |
| Econ inactive | 5.8 (4.5 to 7.2)     | 7.0 (4.4 to 9.5)     | 5.7 (1.7 to 9.7)     |
| fDR           | 23.7 (20.6 to 26.7)  | 47.0 (43.4 to 50.6)  | 39.5 (35.4 to 43.7)  |
| Old age ret   | -                    | 3.4 (0.1 to 6.7)     | 15.5 (8.8 to 22.3)   |
